# Supplementary material
Source: publisher figshare collection journal article supplement (https://acs.figshare.com/ndownloader/files/4273062)
Supplement: Supplementary file 1 [file 4273062]

## Support Information

### Core-shell Structured Upconversion Luminescent and Mesoporous NaYF<sub>4</sub>:Yb<sup>3+</sup>/Er<sup>3+</sup>@nSiO<sub>2</sub>@mSiO<sub>2</sub> Nanospheres as Carriers for Drug Delivery

Xiaojiao Kang,<sup>†,‡</sup> Ziyong Cheng,<sup>\*†</sup> Chunxia Li,<sup>†</sup> Dongmei Yang,<sup>†,‡</sup> Mengmeng Shang,<sup>†,‡</sup>  
Ping'an Ma,<sup>†</sup> Guogang Li<sup>†,‡</sup>, Nian Liu<sup>§</sup> and Jun Lin<sup>\*,†</sup>

<sup>†</sup>*State Key Laboratory of Rare Earth Resource Utilization, Changchun Institute of Applied Chemistry, Chinese Academy of Sciences, Changchun 130022, P. R. China*

<sup>‡</sup>*Graduate University of the Chinese Academy of Sciences, Beijing 100049, P. R. China*

<sup>§</sup>*No.2 Hospital, Jilin University, Changchun 130041, P. R. China*

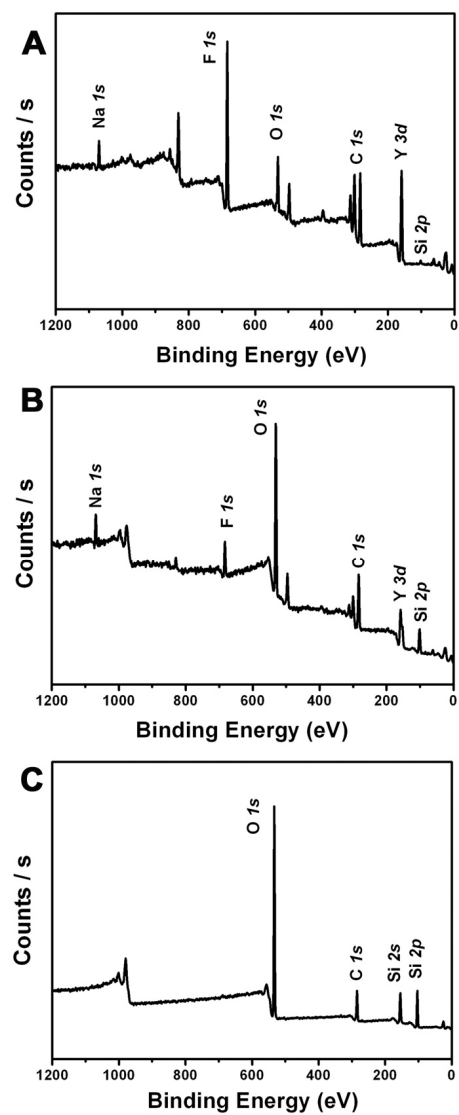

**Figure S1** XPS of NaYF<sub>4</sub>:Yb<sup>3+</sup>/Er<sup>3+</sup>@nSiO<sub>2</sub> (A), NaSiSi-0.10 (B), and NaSiSi-0.30 (C).

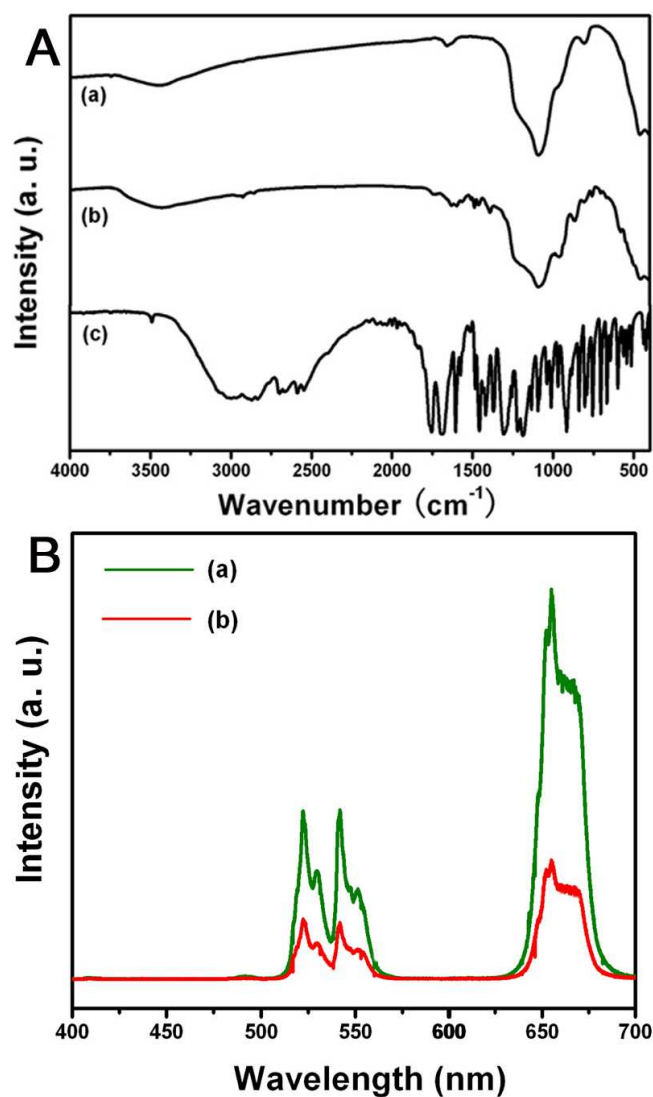

**Figure S2** (A) IR spectra of NaSiSi-0.15 (a), aspirin- NaSiSi-0.15 (b), and aspirin (c). (B) Up-conversion emission spectra of NaSiSi-0.15 (a) and aspirin- NaSiSi-0.15 (b) under 980 nm laser excitation. For aspirin-NaSiSi-0.15, the phenyl bands at 669, 1384, 1461  $\text{cm}^{-1}$ , and  $\nu$  (COOH) band at 1710  $\text{cm}^{-1}$  can be detected, suggesting successful loading of aspirin molecules into the sample.

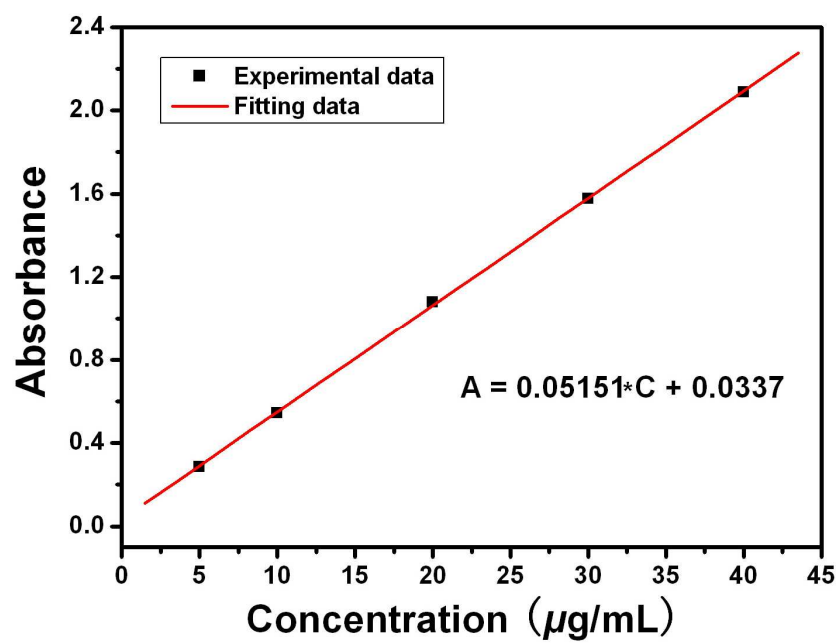

**Figure S3** The calibration curve of IBU.

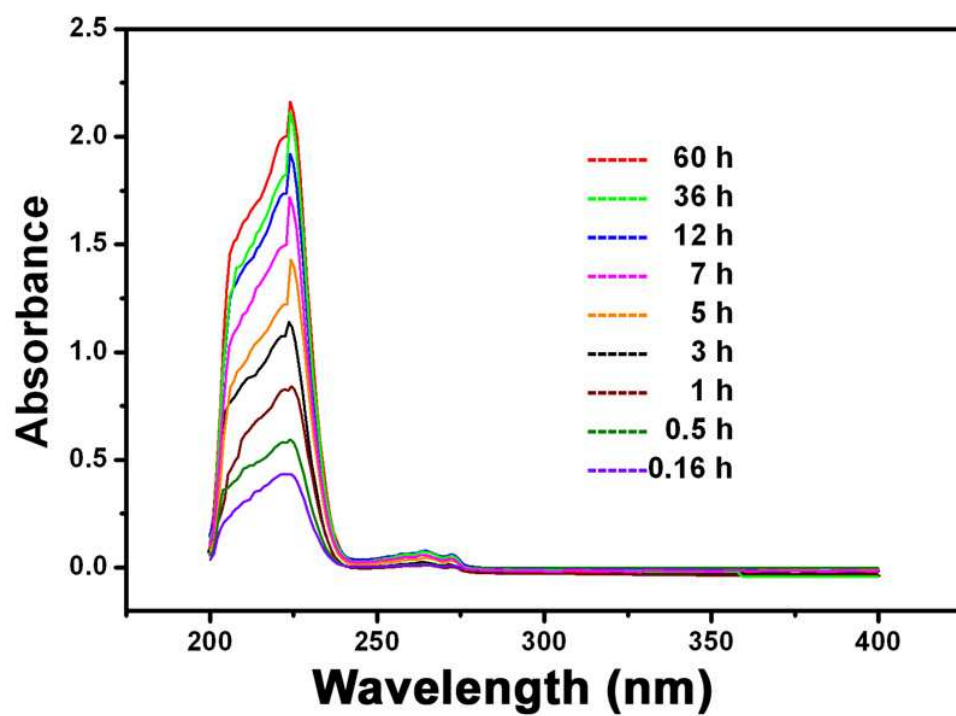

**Figure S4** The UV-*vis* spectra of IBU-NaSiSi-0.15 system at different release time.

**Table S1** Summary of relationship between release time and absorbency of IBU released from IBU-NaSiSi-0.15 system into SBF.

| Time/h                     | 0.16  | 0.5   | 0.67  | 1    | 3     | 5     | 7     | 9     | 12    | 24    | 36    | 48    | 60    |
|----------------------------|-------|-------|-------|------|-------|-------|-------|-------|-------|-------|-------|-------|-------|
| Absorbency<br>of IBU/a. u. | 0.442 | 0.589 | 0.593 | 0.83 | 1.123 | 1.445 | 1.695 | 1.913 | 1.953 | 2.054 | 2.084 | 2.096 | 2.104 |
| Cumulative<br>released     | 13.8  | 19.6  | 21.1  | 30.4 | 42.3  | 54.3  | 68.2  | 80    | 86.8  | 92.3  | 93.5  | 97.6  | 100   |
| IBU/%                      |       |       |       |      |       |       |       |       |       |       |       |       |       |
